# Supplementary material for: Toxoplasma gondii α‐amylase deletion mutant is a promising vaccine against acute and chronic toxoplasmosis
Source: PubMed Central journal article supplement — Microb Biotechnol. 2020 Sep 22;13(6):2057–69. doi: 10.1111/1751-7915.13668 (PMC7533317; doi:10.1111/1751-7915.13668), 2020-09-22
Supplement: MBT2-13-2057-s001.pdf [file MBT2-13-2057-s001.pdf]

**Table S1** Primers used in the study.

| Primer                 | Sequence                                       | Use                                                                                                |
|------------------------|------------------------------------------------|----------------------------------------------------------------------------------------------------|
| gRNA- $\alpha$ -AMY-Fw | 5'-GTCCCAGGGCATGCTATGGAGTTTTAGAGCTAGAAATAGC-3' | To construct the $\alpha$ -AMY specific CRISPR plasmid                                             |
| gRNA- $\alpha$ -AMY-Rv | 5'-AACTTGACATCCCCATTTAC-3'                     | To construct the $\alpha$ -AMY specific CRISPR plasmid                                             |
| PUC19-Fw               | 5'-GGCGTAATCATGGTCATAGC-3'                     | Amplification of pUC19 for Gibson assembly                                                         |
| PUC19-Rv               | 5'-ACTGGCCGTCGTTTTACAAC-3'                     | Amplification of pUC19 for Gibson assembly                                                         |
| loxp-DHFR* -loxp-Fw    | 5'-CAACCCGCGCAGAAGACATC-3'                     | Amplification of loxp-DHFR* -loxp for Gibson assembly                                              |
| loxp-DHFR* -loxp-Rv    | 5'-GGACACGCTGAACTTGTGGC-3'                     | Amplification of loxp-DHFR* -loxp for Gibson assembly                                              |
| U5 $\alpha$ -AMY-Fw    | 5'-GTTGTAAAACGACGGCCAGTAAGCGCCAGAGGTCGCAGTT-3' | Amplification of 5'-homology of $\alpha$ -AMY for<br>p $\alpha$ -AMY:loxp-DHFR* -loxp construction |
| U5 $\alpha$ -AMY-Rv    | 5'-GATGTCTTCTGCGCGGGTTGGTTCCAGAAGTTCTGCGTC-3'  | Amplification of 5'-homology of $\alpha$ -AMY for<br>p $\alpha$ -AMY:loxp-DHFR* -loxp construction |

---

|                       |                                                 |                                                                                                |
|-----------------------|-------------------------------------------------|------------------------------------------------------------------------------------------------|
| U3 $\alpha$ -AMY-Rv   | 5'-GCCACAAGTTCAGCGTGTCCAGAAAGTTCTTTTCAAGTCTC-3' | Amplification of 3'-homology of $\alpha$ -AMY for p $\alpha$ -AMY:loxp-DHFR*-loxp construction |
| U3 $\alpha$ -AMY-Rv   | 5'-GCTATGACCATGATTACGCCGGTGTACAAGAGGAACATGA-3'  | Amplification of 3'-homology of $\alpha$ -AMY for p $\alpha$ -AMY:loxp-DHFR*-loxp construction |
| 5'-UpU5 $\alpha$ -AMY | 5'-TGCACAAGATGCATGTACCTG-3'                     | PCR1 of $\Delta\alpha$ -amy                                                                    |
| 3'-In DHFR*           | 5'-GATTTGTGAGGACGACTCAC-3'                      | PCR1 of $\Delta\alpha$ -amy                                                                    |
| 5'-In DHFR*           | 5'-CACGACAGCAGACAACCTTTC-3'                     | PCR2 of $\Delta\alpha$ -amy                                                                    |
| 3'-DnU3 $\alpha$ -AMY | 5'-CTCTGTGTTCTCGGGTGTCA-3'                      | PCR2 of $\Delta\alpha$ -amy                                                                    |
| In- $\alpha$ -AMY-Fw  | 5'-GTAGCTTCAAGAAACAGTTCACAG-3'                  | PCR3 of $\Delta\alpha$ -amy                                                                    |
| In- $\alpha$ -AMY-Rv  | 5'-CGAGTCGAAACCAGCGCTGTTGC-3'                   | PCR3 of $\Delta\alpha$ -amy                                                                    |
| Vec-Fw                | 5'-GAGGTCCACACGAACCAGGAC -3'                    | Amplification of pTub-YFP-CAT for pComp- $\alpha$ -AMY construction                            |
| Vec-Rv                | 5'-CTTGCTCACCATTTTAGATC-3'                      | Amplification of pTub-YFP-CAT for pComp- $\alpha$ -AMY                                         |

---

---

|                         |                                                 |                                                                                           |
|-------------------------|-------------------------------------------------|-------------------------------------------------------------------------------------------|
|                         |                                                 | construction                                                                              |
| $\alpha$ -AMY-CDS-Fw    | 5'-GATCTAAAATGGTGAGCAAGATGGGAGATCTTCGAGCATC-3'  | Amplification of $\alpha$ -AMY CDS for pTub-YFP-CAT for pComp- $\alpha$ -AMY construction |
| $\alpha$ -AMY-CDS-Rv    | 5'-GTCCTGGTTCGTGTGGACCTCCTCCTGGCGCTCGTAAACAG-3' | Amplification of $\alpha$ -AMY CDS for pTub-YFP-CAT for pComp- $\alpha$ -AMY construction |
| $\alpha$ -AMY-Fw        | 5'-CTTGTCAGCTGTCTCCTCCGGTGC-3'                  | PCR4 of pComp- $\alpha$ -AMY                                                              |
| $\alpha$ -AMY-Rv        | 5'-CCAACCTTGTCACCAGCGTCTCG-3'                   | PCR4 of pComp- $\alpha$ -AMY                                                              |
| RT- $\beta$ -tubulin-Fw | 5'-CACTGGTACACGGGTGAAGGT-3'                     | $\beta$ -tubulin-based qPCR                                                               |
| RT- $\beta$ -tubulin-Rv | 5'-ATTCTCCCTCTTCCTCTGCG-3'                      | $\beta$ -tubulin-based qPCR                                                               |

---
